# Supplementary material
Source: HighWire-hosted journal article supplement (https://www.jrheum.org/highwire/filestream/42606/field_highwire_adjunct_files/0/220152DataSuppl.pdf)

## Data Supplement

### Data S1 (Search strategy and terms)

**De-escalating biologic DMARDs – combined searches – 2014-August 30, 2021**

**PubMed: 974; Embase: 2996; Cochrane: 1793 - 4429 Total after deduplication**

#### Prisma Diagram

5763 references imported for screening as 5762 studies  
 1333 duplicates removed  
 4429 studies screened against title and abstract  
 3925 studies excluded  
 504 studies assessed for full-text eligibility  
 494 studies excluded  
     350 Wrong study design  
     65 duplicates  
     62 reviews  
     8 retrospectives  
     8 editorials  
     1 not in English  
 0 studies ongoing  
 0 studies awaiting classification  
 10 studies included

#### PubMed

TNF-inhibitor agents[tw] OR TNF inhibitors[tw] OR TNF agents[tw] OR TNF blocker[tw] OR "tumor necrosis factor inhibitors"[mesh] OR tumor necrosis factor inhibitors[tw] OR tumour necrosis factor inhibitors[tw] OR tumor necrosis factor agents[tw] OR tumour necrosis factor agents[tw] OR Tumor necrosis factor blocker[tw] OR Tumour necrosis factor blocker[tw] OR disease-modifying antirheumatic drugs[tw] OR DMARD[tw] OR Etanercept[tw] OR Methotrexate[Mesh] OR Methotrexate[tw] OR etanercept[mesh] OR etanercept[tw] OR infliximab[mesh] OR infliximab[tw] OR adalimumab[mesh] OR adalimumab[tw] OR golimumab[Supplementary Concept] OR golimumab[tw] OR Certolizumab Pegol[mesh] OR Certolizumab[tw] OR tocilizumab[tw] OR abatacept[mesh] OR abatacept[tw] OR "Sulfasalazine"[Mesh] OR Sulfasalazine[tw] OR "Hydroxychloroquine"[Mesh] OR Hydroxychloroquine[tw] OR "Leflunomide"[Mesh] OR Leflunomide[tw] OR Sarilumab[tw] OR "sarilumab" [Supplementary Concept] OR Tofacitinib[tw] OR "tofacitinib" [Supplementary Concept] OR upadacitinib [tw] OR Janus Kinase Inhibitors[Mesh] OR Janus Kinase Inhibitors[tw] OR Jak-inhibitors[tw] OR "Rituximab"[Mesh] OR Rituximab[tw]

#### AND

Stop[tw] OR stopping[tw] OR Withdrawal[tw] OR Withdrawals[tw] OR Withdraw[tw] OR Withdraws[tw] OR withdrawing[tw] OR Tapering[tw] OR Taper[tw] OR tapered[tw] OR reduction[tw] OR de-escalation[tw] OR drug-free remission[tw]

#### AND

Rheumatoid arthritis[tw] OR RA[tw] OR "arthritis, rheumatoid"[mesh]

**NOT** "Spondylitis, Ankylosing"[Mesh] OR "Spondylarthropathies"[Mesh] OR "Lupus Erythematosus, Systemic"[Mesh] OR "Scleroderma, Diffuse"[Mesh] OR "Arthritis, Psoriatic"[Mesh] OR "Vasculitis"[Mesh]

**NOT** (animals[mesh] NOT humans[mesh])

**NOT** comment[pt] OR letter[pt] OR "historical article"[pt] OR news[pt] OR "newspaper article"[pt] OR "case report"[ti]

**AND** English[language]

**AND** 2014-2021

#### EMBASE

"TNF-inhibitor agents":ti,ab,de,tn,kw OR "TNF inhibitors":ti,ab,de,tn,kw OR "TNF agents":ti,ab,de,tn,kw OR "TNF blocker":ti,ab,de,tn,kw OR 'tumor necrosis factor inhibitor'/exp OR "tumor necrosis factor inhibitors":ti,ab,de,tn,kw OR "tumour necrosis factor inhibitors":ti,ab,de,tn,kw OR "tumor necrosis factor agents":ti,ab,de,tn,kw OR "tumour necrosis factor agents":ti,ab,de,tn,kw OR "Tumor necrosis factor blocker":ti,ab,de,tn,kw OR "Tumour necrosis factor blocker":ti,ab,de,tn,kw OR "disease-modifying antirheumatic drugs":ti,ab,de,tn,kw OR DMARD:ti,ab,de,tn,kw OR Etanercept:ti,ab,de,tn,kw OR 'methotrexate'/exp OR Methotrexate:ti,ab,de,tn,kw OR 'etanercept'/exp OR etanercept:ti,ab,de,tn,kw OR 'infliximab'/exp OR infliximab:ti,ab,de,tn,kw OR 'adalimumab'/exp OR

adalimumab:ti,ab,de,tn,kw OR 'golimumab'/exp OR golimumab:ti,ab,de,tn,kw OR 'Certolizumab Pegol'/exp OR Certolizumab:ti,ab,de,tn,kw OR tocilizumab:ti,ab,de,tn,kw OR 'abatacept'/exp OR abatacept:ti,ab,de,tn,kw OR 'salazosulfapyridine'/exp OR Sulfasalazine:ti,ab,de,tn,kw OR 'hydroxychloroquine'/exp OR Hydroxychloroquine:ti,ab,de,tn,kw OR 'leflunomide'/exp OR Leflunomide:ti,ab,de,tn,kw OR Sarilumab:ti,ab,de,tn,kw OR 'sarilumab'/exp OR Tofacitinib:ti,ab,de,tn,kw OR 'tofacitinib'/exp OR Baricitinib:ti,ab,de,tn,kw OR 'baricitinib'/exp OR upadacitinib:ti,ab,de,tn,kw OR 'upadacitinib'/exp OR 'Janus Kinase Inhibitor'/exp OR Janus Kinase Inhibitors:ti,ab,de,tn,kw OR Jak-inhibitors:ti,ab,de,tn,kw OR 'Rituximab'/exp OR Rituximab:ti,ab,de,tn,kw

**AND**

Stop:ti,ab,de,tn,kw OR stopping:ti,ab,de,tn,kw OR Withdrawal:ti,ab,de,tn,kw OR Withdrawals:ti,ab,de,tn,kw OR Withdraw:ti,ab,de,tn,kw OR Withdraws:ti,ab,de,tn,kw OR withdrawing:ti,ab,de,tn,kw OR Tapering:ti,ab,de,tn,kw OR Taper:ti,ab,de,tn,kw OR tapered:ti,ab,de,tn,kw OR reduction:ti,ab,de,tn,kw OR de-escalation:ti,ab,de,tn,kw OR "drug-free remission":ti,ab,de,tn,kw

**AND**

"Rheumatoid arthritis":ti,ab,de,tn,kw OR RA:ti,ab,de,tn,kw OR 'rheumatoid arthritis'/exp

**NOT**

'ankylosing spondylitis'/exp OR 'spondyloarthropathy'/exp OR 'systemic lupus erythematosus'/exp OR 'diffuse scleroderma'/exp OR 'psoriatic arthritis'/exp OR 'vasculitis'/exp

**AND** ('article'/it OR 'article in press'/it OR 'review'/it OR editorial/it)

**AND** [humans]/lim

**AND** [english]/lim

**AND** [2014-2021]/py

**Cochrane**

"TNF-inhibitor agents":ti,ab,kw OR "TNF inhibitors":ti,ab,kw OR "TNF agents":ti,ab,kw OR "TNF blocker":ti,ab,kw OR [mh "tumor necrosis factor inhibitors"] OR "tumor necrosis factor inhibitors":ti,ab,kw OR "tumour necrosis factor inhibitors":ti,ab,kw OR "tumor necrosis factor agents":ti,ab,kw OR "tumour necrosis factor agents":ti,ab,kw OR "Tumor necrosis factor blocker":ti,ab,kw OR "Tumour necrosis factor blocker":ti,ab,kw OR "disease-modifying antirheumatic drugs":ti,ab,kw OR DMARD:ti,ab,kw OR Etanercept:ti,ab,kw OR [mh Methotrexate] OR Methotrexate:ti,ab,kw OR [mh etanercept] OR etanercept:ti,ab,kw OR [mh infliximab] OR infliximab:ti,ab,kw OR [mh adalimumab] OR adalimumab:ti,ab,kw OR "golimumab[Supplementary Concept]" OR golimumab:ti,ab,kw OR [mh "Certolizumab Pegol"] OR Certolizumab:ti,ab,kw OR tocilizumab:ti,ab,kw OR [mh abatacept] OR abatacept:ti,ab,kw OR [mh Sulfasalazine] OR Sulfasalazine:ti,ab,kw OR [mh Hydroxychloroquine] OR Hydroxychloroquine:ti,ab,kw OR [mh Leflunomide] OR Leflunomide:ti,ab,kw OR Sarilumab:ti,ab,kw OR "sarilumab [Supplementary Concept]" OR Tofacitinib:ti,ab,kw OR "tofacitinib [Supplementary Concept]" OR Baricitinib:ti,ab,kw OR "baricitinib [Supplementary Concept]" OR upadacitinib:ti,ab,kw OR [mh "Janus Kinase Inhibitors"] OR Janus Kinase Inhibitors:ti,ab,kw OR Jak-inhibitors:ti,ab,kw OR [mh Rituximab] OR Rituximab:ti,ab,kw

**AND**

Stop:ti,ab,kw OR stopping:ti,ab,kw OR Withdrawal:ti,ab,kw OR Withdrawals:ti,ab,kw OR Withdraw:ti,ab,kw OR Withdraws:ti,ab,kw OR withdrawing:ti,ab,kw OR Tapering:ti,ab,kw OR Taper:ti,ab,kw OR tapered:ti,ab,kw OR reduction:ti,ab,kw OR de-escalation:ti,ab,kw OR "drug-free remission":ti,ab,kw

**AND**

"Rheumatoid arthritis":ti,ab,kw OR RA:ti,ab,kw OR [mh "arthritis, rheumatoid"]

**NOT**

[mh "Spondylitis, Ankylosing"] OR [mh Spondylarthropathies] OR [mh "Lupus Erythematosus, Systemic"] OR [mh "Scleroderma, Diffuse"] OR [mh "Arthritis, Psoriatic"] OR [mh Vasculitis]

**NOT** ([mh animals] NOT [mh humans])

**NOT** comment:pt OR letter:pt OR "historical article":pt OR news:pt OR "newspaper article":pt OR "case report":ti with Cochrane Library publication date from Jan 2014 to present

Table S1: Risk of bias assessment of nonrandomized study included in analysis using ROBINS-I

|       |                     | Risk of bias domains |    |    |    |    |    |    |         |                     |
|-------|---------------------|----------------------|----|----|----|----|----|----|---------|---------------------|
|       |                     | D1                   | D2 | D3 | D4 | D5 | D6 | D7 | Overall | Judgement           |
| Study | Keystone et al 2018 |                      |    |    |    |    |    |    |         |                     |
|       |                     |                      |    |    |    |    |    |    |         | Serious<br>Moderate |

**Domains:**

- D1:** Bias due to confounding.
- D2:** Bias due to selection of participants.
- D3:** Bias in classification of interventions.
- D4:** Bias due to deviations from intended interventions.
- D5:** Bias due to missing data.
- D6:** Bias in measurement of outcomes.
- D7:** Bias in selection of the reported result.

**Criteria for determining overall risk-of-bias judgements using the ROBINS-I:**

- Low risk of bias:** The study is judged to be at low risk of bias for all domains.
- Moderate risk of bias:** The study is judged to be at low or moderate risk of bias for all domains.
- Serious risk of bias:** The study is judged to be at serious risk of bias in at least one domain, but not at critical risk of bias in any domain.
- Critical risk of bias:** The study is judged to be at critical risk of bias in at least one domain.
- No information** denotes no information upon which to base a judgement about risk of bias. There is no clear indication that the study is at serious or critical risk of bias and there is a lack of information in one or more key domains of bias.

**Table S2: Patients, interventions, comparators, outcomes and design of included studies**

| Trial/ Author             | Participants                                                                                                                                                                                                                                                                                                                          | Intervention                                              | Comparison Group*                                                                                                                                                                       | Outcome Measure (for REM)                                                                                                                                                         | Design                                                                                                                                                                                                                                                      |
|---------------------------|---------------------------------------------------------------------------------------------------------------------------------------------------------------------------------------------------------------------------------------------------------------------------------------------------------------------------------------|-----------------------------------------------------------|-----------------------------------------------------------------------------------------------------------------------------------------------------------------------------------------|-----------------------------------------------------------------------------------------------------------------------------------------------------------------------------------|-------------------------------------------------------------------------------------------------------------------------------------------------------------------------------------------------------------------------------------------------------------|
| SEAM<br>Curtis et al      | Established RA patients (classification criteria not specified) on ETA+MTX n SDAI REM <3.3 by end of 24 wk run-period MTX <sub>≥</sub> 8 weeks                                                                                                                                                                                        | 1) ETA + placebo (MTX WD, n= 101)                         | 2) continue ETA + MTX (n=51)<br>3) oral methotrexate + sq placebo (ETA WD, n=101)                                                                                                       | prop of patients achieving SDAI REM <3.3 without disease worsening at wk 48 in ETA mono vs MTX mono group                                                                         | International, multicenter study with 24 wk open-label run-in period<br>48 wk randomized, controlled double-blind Treatment WD period                                                                                                                       |
| AVERT 2<br>Emery et al    | Early RA by ACL/EULAR 2010 criteria<br>Disease duration < 6 mos<br>anti-CCP positive<br>Active disease SDAI > 11, CRP > 3 or ESR > 28 and > 3 TJC + 3 SJC<br>DMARD-naive<br>achieved sustained SDAI REM <3.3 at wks 40 and 52 in induction period                                                                                     | 1) ABA mono + placebo (MTX WD, n= 47)                     | 2) ABA+MTX (n=50)<br>3) MTX + placebo ABA (from induction period)* (ABA WD, n=37)<br>4) ABA every other wk + MTX for 24 wks then ABA placebo + MTX for 24 wks (ABA taper then WD, n=50) | exploratory endpoints at DE wk 48 (study wk 104)<br>prop of patients with SDAI REM < 3.3 at wk 48 of DE period                                                                    | Phase 3b, randomized, double-blind clinical trial with<br>56 wk induction treatment period:<br>Randomized 3:2 to blinded induction treatment ABA+MTX or ABA placebo + MTX or taper ABA before stopping ABA+MTX<br>48 wk treatment de-escalation period (DE) |
| ORAL Shift<br>Cohen et al | Established RA<br>> 6 score on 2010 ACR/EULAR criteria<br>moderate to severe disease<br>CDAI>10 and DAS28ESR>3.2 and > 4 TJC and > 4 SJC<br>inadequate response to methotrexate<br>received oral MTX continuously > 4 mos<br>at stable dose prior to screening<br>achieved LDA (CDAI<10) on study treatment by end of treatment phase | TOFA + placebo (MTX WD, n=267)                            | TOFA + MTX (n=266)                                                                                                                                                                      | prop achieving REM by ACR-EULAR Boolean REM, DAS28-4[ESR]<2.6, DAS28-4[CRP]<2.6, CDAI<2.8, or SDAI <3.3 at wks 36 and 48                                                          | Global, multi-center, 48-wk, phase 3b/4 WD study across 16 countries:<br>30 day screening phase<br>24-wk open-label run-in treatment phase:<br>tofacitinib + MTX<br>24-wk randomized, double-blind, placebo-controlled non-inferiority MTX WD phase         |
| COMET<br>Emery et al      | Early RA (classification criteria not specified), 3-24 mos duration<br>MTX-naïve DAS28 > 3.2<br>ESR > 28 or CRP > 20<br>2019 post-hoc analysis of those who met REM DAS28 < 2.6 at wk 52 (Abstract)                                                                                                                                   | 1) ETA+MTX year 1 and ETA + placebo year 2 (EM/E) (n=111) | 2) <i>ETA+MTX year 1 and 2 EM/EM (n=111)</i><br>3) M/EM (n=90) - MTX + placebo/ETA+MTX<br>4) M/M (n=99)- MTX+placebo year 1 and 2                                                       | prop achieving DAS28 REM at wk 104<br>Odds ratios comparing the ETA+MTX and ETA arms for each wk 52 DAS28 status calculated and their interaction as predictors of achieving REM. | 2 year, double-blind, randomized study<br>1) ETA+MTX year 1 and 2 (EM/EM)<br>2) ETA+MTX year 1 and ETA mono year 2 (EM/E)<br>3) MTX mono year 1 and ETA+MTX year 2 (M/EM)<br>4) MTX mono year 1 and 2 (M/M)                                                 |
| JUST-ACT<br>Pablos et al  | Established RA (classification criteria not specified) moderate to severe disease<br>DAS28>3.2 receiving MTX for > 12 wks at stable dosage for > 6 wks before study treatment.<br>Achieved LDA DAS28 < 3.2 in treatment phase                                                                                                         | TCZ + placebo (MTX WD, n=82)                              | TCZ + MTX (n=83)                                                                                                                                                                        | prop of clinical REM at wk 28 based on DAS28 >2.6                                                                                                                                 | Phase 3, multicenter, randomized, double-blind, parallel group, placebo-controlled study.<br>16 wk treatment period with TCZ IV + MTX<br>12 wk WD MTX phase until wk 28                                                                                     |
| Pope et al                | Established RA (classification criteria not specified) on csDMARD deemed to benefit from adding CZP per Canadian product monograph, met reimbursement criteria to obtain CZP<br>achieved change in DAS28 ≥ 1.2 on treatment                                                                                                           | 1) Stop csDMARD (CZP MONO n=45)                           | 2) continue csDMARD + CZP (COMBO n=43)                                                                                                                                                  | prop of DAS28 REM <2.6, CDAI REM < 2.8                                                                                                                                            | Real-world, multicenter, open-label RCT comparing discontinuing csDMARD after CZP added versus continuing combination therapy with 1 year follow-up.<br>No protocolized intervention besides randomization.                                                 |

|                                                                                                                                                                                                                                                                                                                                                                                                                                                                                                                                                                                                                                                                                                                                                                                                                                                                                         |                                                                                                                                                                                                                                                                                                                                                                                                                                                                                              |                                                                                                                                                            |                                                                                    |                                                          |                                                                                                                                                                                                                                                                                           |
|-----------------------------------------------------------------------------------------------------------------------------------------------------------------------------------------------------------------------------------------------------------------------------------------------------------------------------------------------------------------------------------------------------------------------------------------------------------------------------------------------------------------------------------------------------------------------------------------------------------------------------------------------------------------------------------------------------------------------------------------------------------------------------------------------------------------------------------------------------------------------------------------|----------------------------------------------------------------------------------------------------------------------------------------------------------------------------------------------------------------------------------------------------------------------------------------------------------------------------------------------------------------------------------------------------------------------------------------------------------------------------------------------|------------------------------------------------------------------------------------------------------------------------------------------------------------|------------------------------------------------------------------------------------|----------------------------------------------------------|-------------------------------------------------------------------------------------------------------------------------------------------------------------------------------------------------------------------------------------------------------------------------------------------|
| COMP-<br>ACT<br>Kremer et al                                                                                                                                                                                                                                                                                                                                                                                                                                                                                                                                                                                                                                                                                                                                                                                                                                                            | Established RA by 1987 ACR criteria moderate to severe disease, DAS28>4.4 , inadequate response to MTX and weighing < 150 kg, who completed treatment period and who achieved LDA DAS28-ESR< 3.2 entered the WD period.<br>Those who did not achieve LDA DAS28-ESR<3.2 were assigned to open-label nonrandomized arm and continued to receive TCZ+MTX through wk 52 (n=308)                                                                                                                  | TCZ+ placebo (TCZ monotherapy, n=147)                                                                                                                      | Continue TCZ + MTX (n=147)                                                         | prop of patients with DAS28-ESR < 2.6 at wk 40 and wk 52 | Randomized, multi-center, double-blind, parallel group, 52-wk study plus 8 wks follow up<br>24 wk treatment period:<br>TCZ sq plus oral MTX<br>28 wk MTX WD period                                                                                                                        |
| ACT-<br>TAPER<br>Edwards et al                                                                                                                                                                                                                                                                                                                                                                                                                                                                                                                                                                                                                                                                                                                                                                                                                                                          | Established RA by 2010 ACR/EULAR criteria inadequate response to two DMARDs including MTX and no previous bDMARD<br>DAS28>5.1 on 2 occasions 1 mo apart achieved good/moderate EULAR response (see outcome measures) at wk 24 of treatment                                                                                                                                                                                                                                                   | Group A: double-blind MTX taper + TCZ<br>Taper occurred every 8 wks until 0 mg at wk 48 or disease flare occurred (n=136)<br>Placebo details not specified | Group B: double-blind stable MTX + TCZ (n=136)                                     | prop of patients in DAS28 REM <2.6 at wks 60 and 72      | Randomized, placebo-controlled, non-inferiority study with open label treatment phase followed by randomized WD phase<br>24 wk treatment phase: all DMARDs except MTX were discontinued and started open-label IV TCZ every 4 wks and open-label MTX<br>48 wk MTX WD double-blinded phase |
| CAMEO<br>Keystone et al                                                                                                                                                                                                                                                                                                                                                                                                                                                                                                                                                                                                                                                                                                                                                                                                                                                                 | Established RA by 1987 ARA criteria on stable MTX therapy > 4 wks before baseline with inadequate response, TNFi-naive moderate to severe disease (>3 swollen joints, DAS28>3.2) were treated during study as standard of care (no sponsor drug), with ability to access ETA via insurance.<br>2016 2 year update did pre-specified analysis stratified by response at time of randomization at mo 6 by DAS28-ESR LDA/REM < 3.2 vs moderate to high disease activity (MHDA; DAS28-ESR > 3.2) | ETA monotherapy (n=98)                                                                                                                                     | ETA + MTX (n=107)                                                                  | DAS28-ESR REM at mo 24                                   | Phase 4, multicenter, open-label, unblinded randomized<br>24 mo trial across 27 centers in Canada<br>6 mo treatment phase: ETA+ MTX<br>18 mo MTX WD phase                                                                                                                                 |
| Keystone et al (observational)                                                                                                                                                                                                                                                                                                                                                                                                                                                                                                                                                                                                                                                                                                                                                                                                                                                          | Early RA < 3 years by 1987 ACR criteria DMARD-naive + SJC $\geq$ 8 + TJC $\geq$ 10 + ESR $\geq$ 28 or CRP $\geq$ 1.5 RF+ or $\geq$ 1 joint erosion achieved DAS28-CRP<3.2 LDA on ADA+MTX during a 2 year double blind study could then receive ADA monotherapy for up to 8 years during LTE.                                                                                                                                                                                                 | Observed discontinuation of MTX defined as MTX non-use                                                                                                     | Those who restarted open-label MTX per investigator discretion, defined as MTX use | DAS28-CRP <2.6 REM                                       | Post-hoc analysis of LTE study (up to 3 years) of early RA who attained LDA on ADA+MTX and withdrew MTX. Rates of retaining LDA and achieving REM between those who did not use MTX and those who restarted it were compared.                                                             |
| * in cases of multiple comparator groups, one selected for meta-analysis is italicized* ADA adalimumab, bDMARDs biologic DMARDs, CDAI Clinical disease activity index, CRP C-Reactive Protein, csDMARDs conventional synthetic DMARDs, CZP certolizumab, DAS28 Disease Activity Score 28, DAS28-ESR Disease Activity Score 28 (using ESR), both DAS28 which uses the ESR and DAS28-CRP REM defined as score < 2.6, DMARD Disease Modifying Anti-Rheumatic Drug, ESR erythrocyte sedimentation rate, ETA etanercept, LDA low disease activity, Mono monotherapy, MTX methotrexate, LTE long-term extension, RF rheumatoid factor, RCT randomized controlled trial, SDAI Simplified disease activity index, SJC swollen joint count, TJC tender joint count, TCZ tocilizumab, TNFi TNF-inhibitor, TOFA tofacitinib, targeted therapy bDMARDs and JAK-i, mo month, wk week, WD withdrawal. |                                                                                                                                                                                                                                                                                                                                                                                                                                                                                              |                                                                                                                                                            |                                                                                    |                                                          |                                                                                                                                                                                                                                                                                           |

Figure S1: Comparison of studies tapering methotrexate from targeted therapy by established or early RA

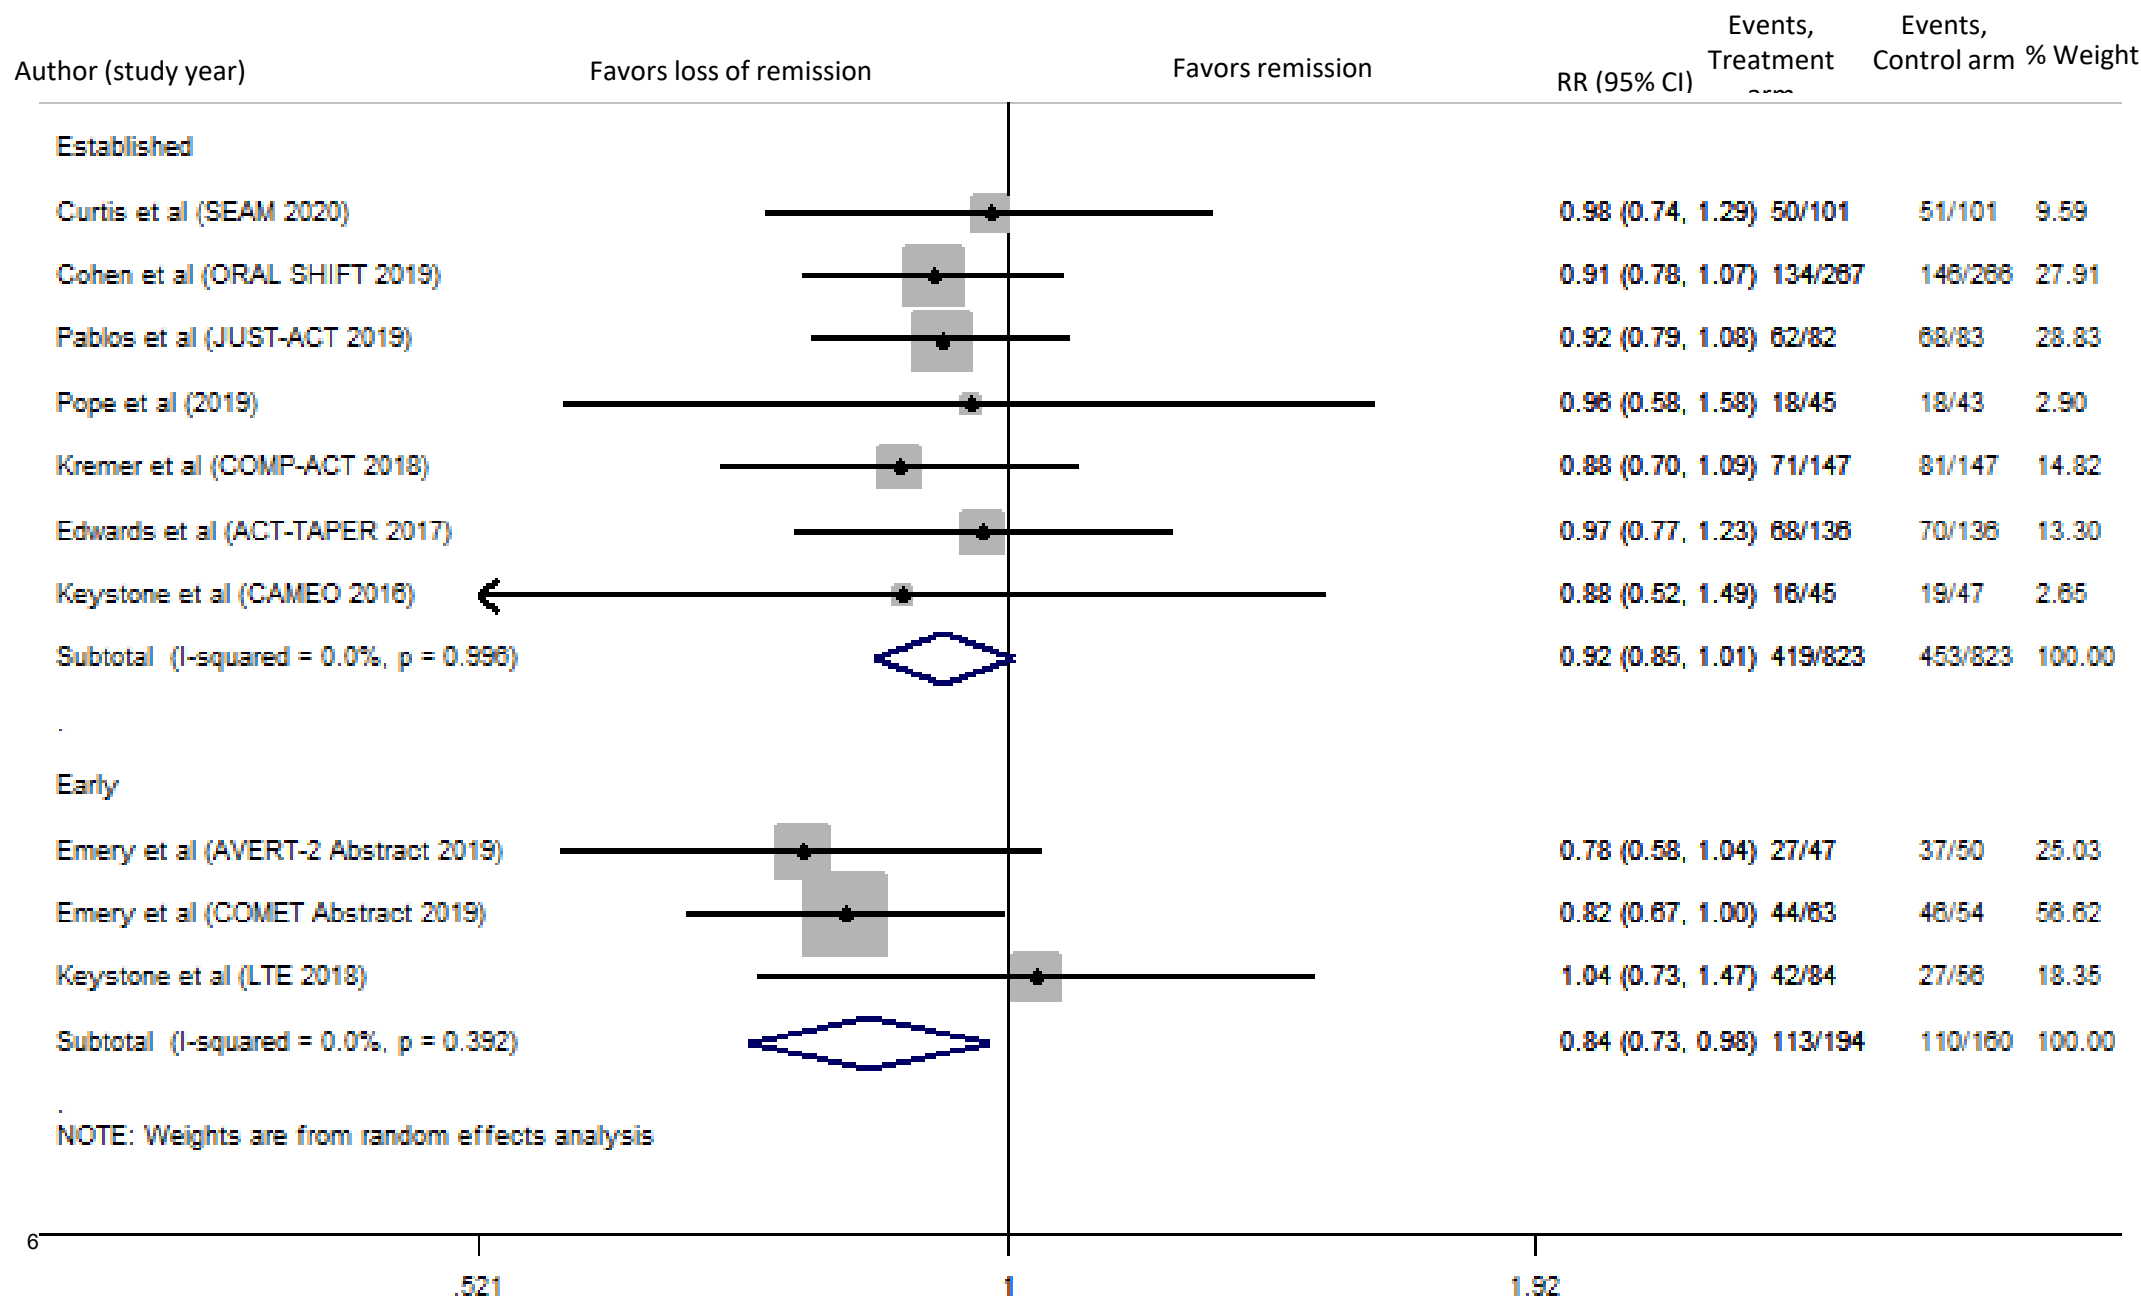

Figure S2: Studies tapering methotrexate from targeted therapy evaluating low disease activity (LDA) outcomes

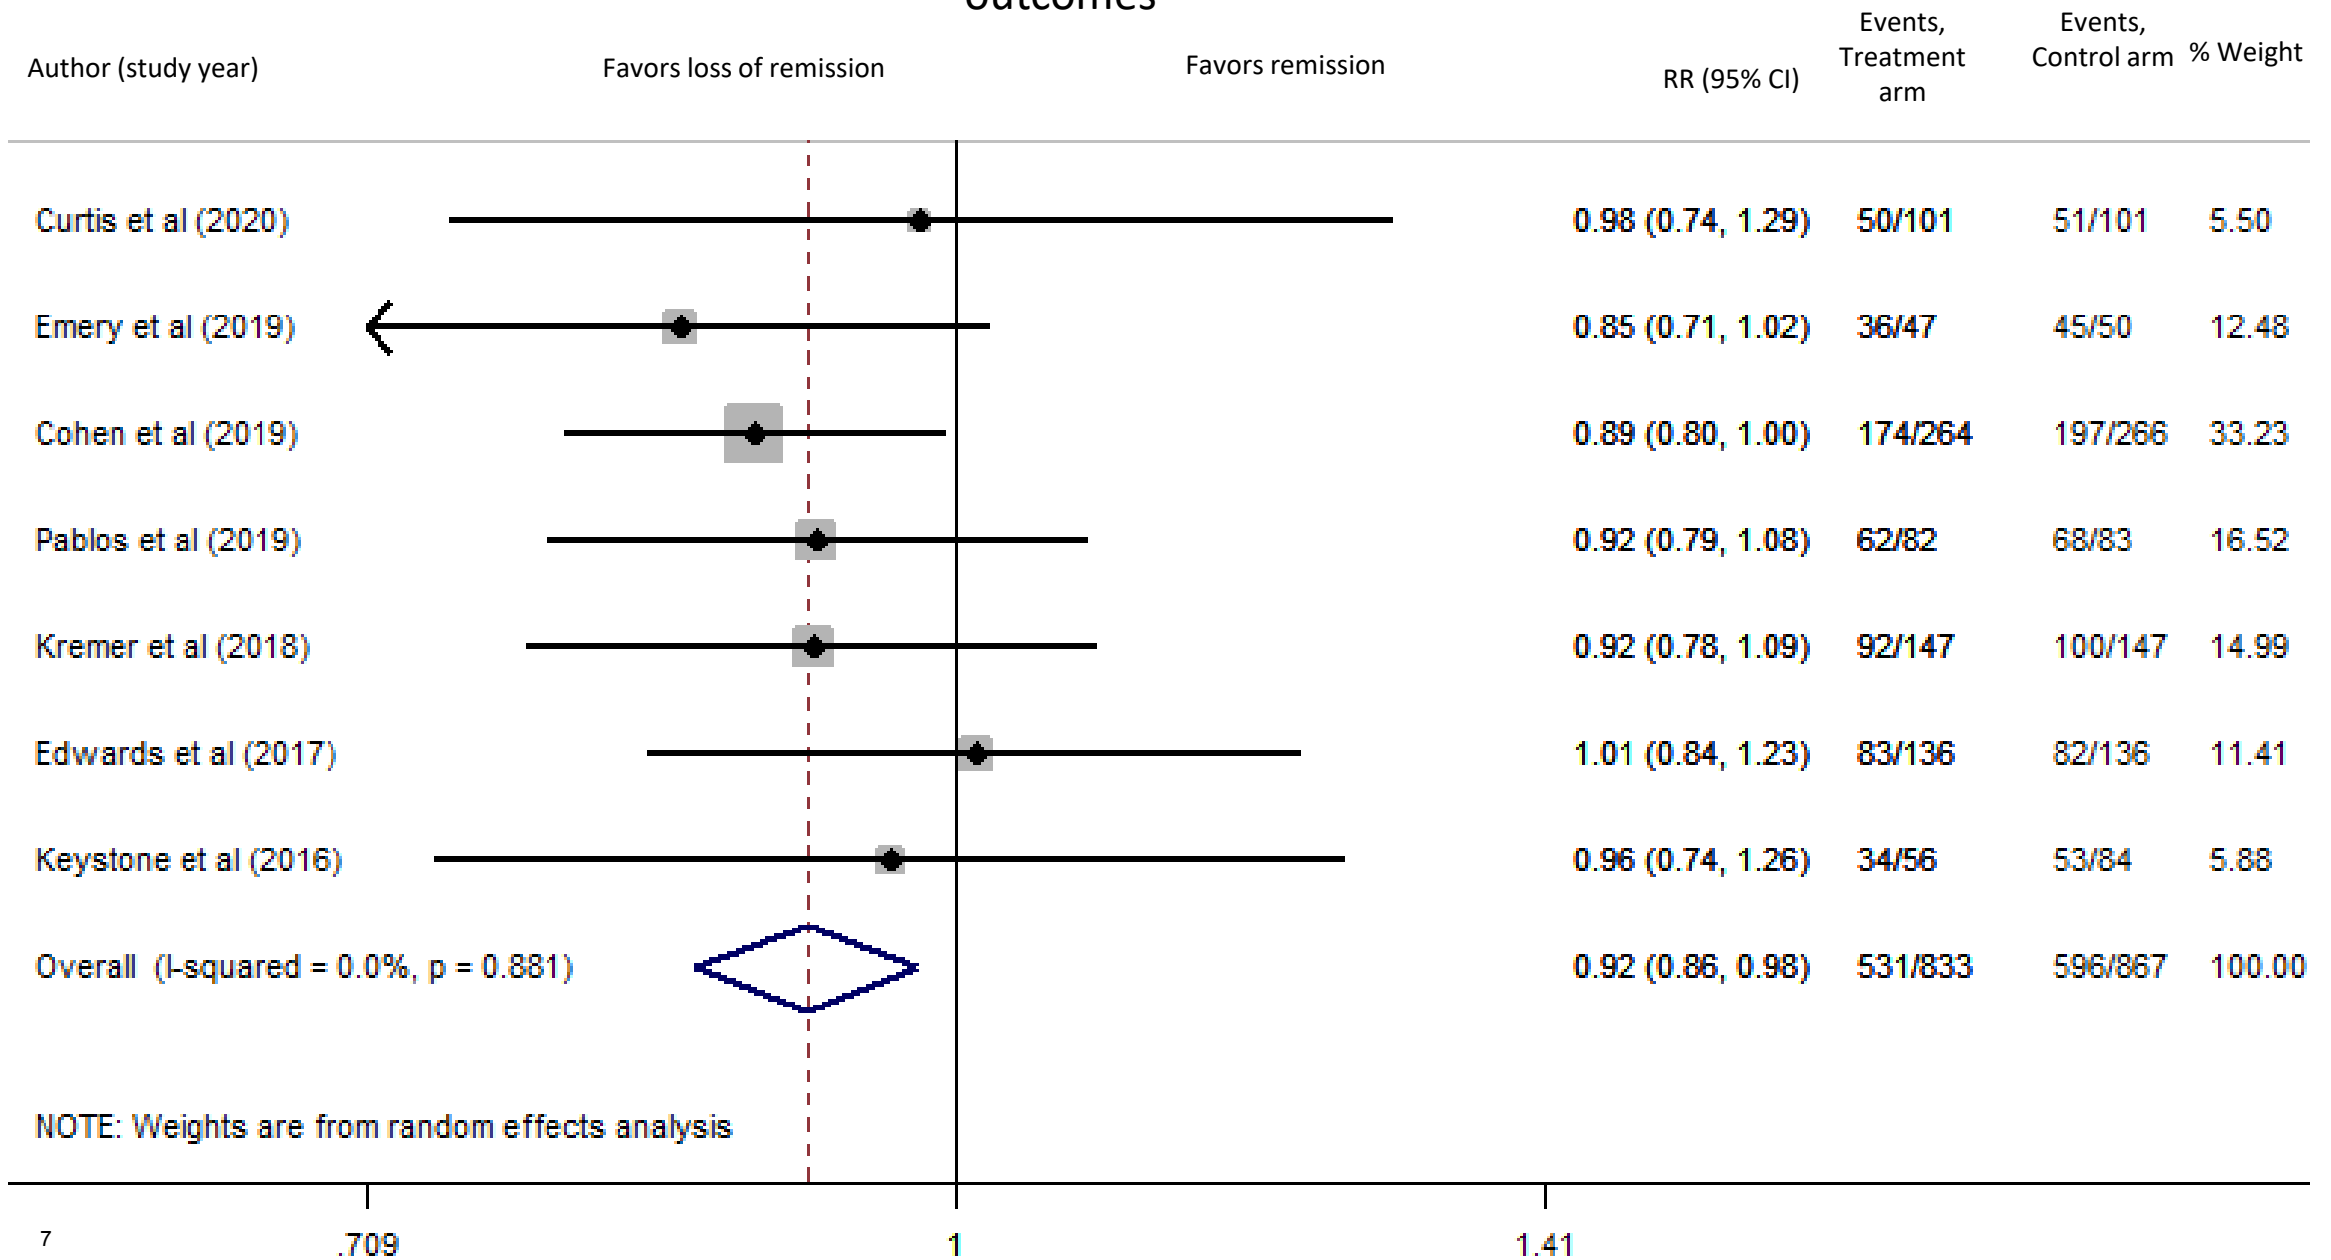

Figure S3: Sensitivity analysis with LTE 2018 omitted

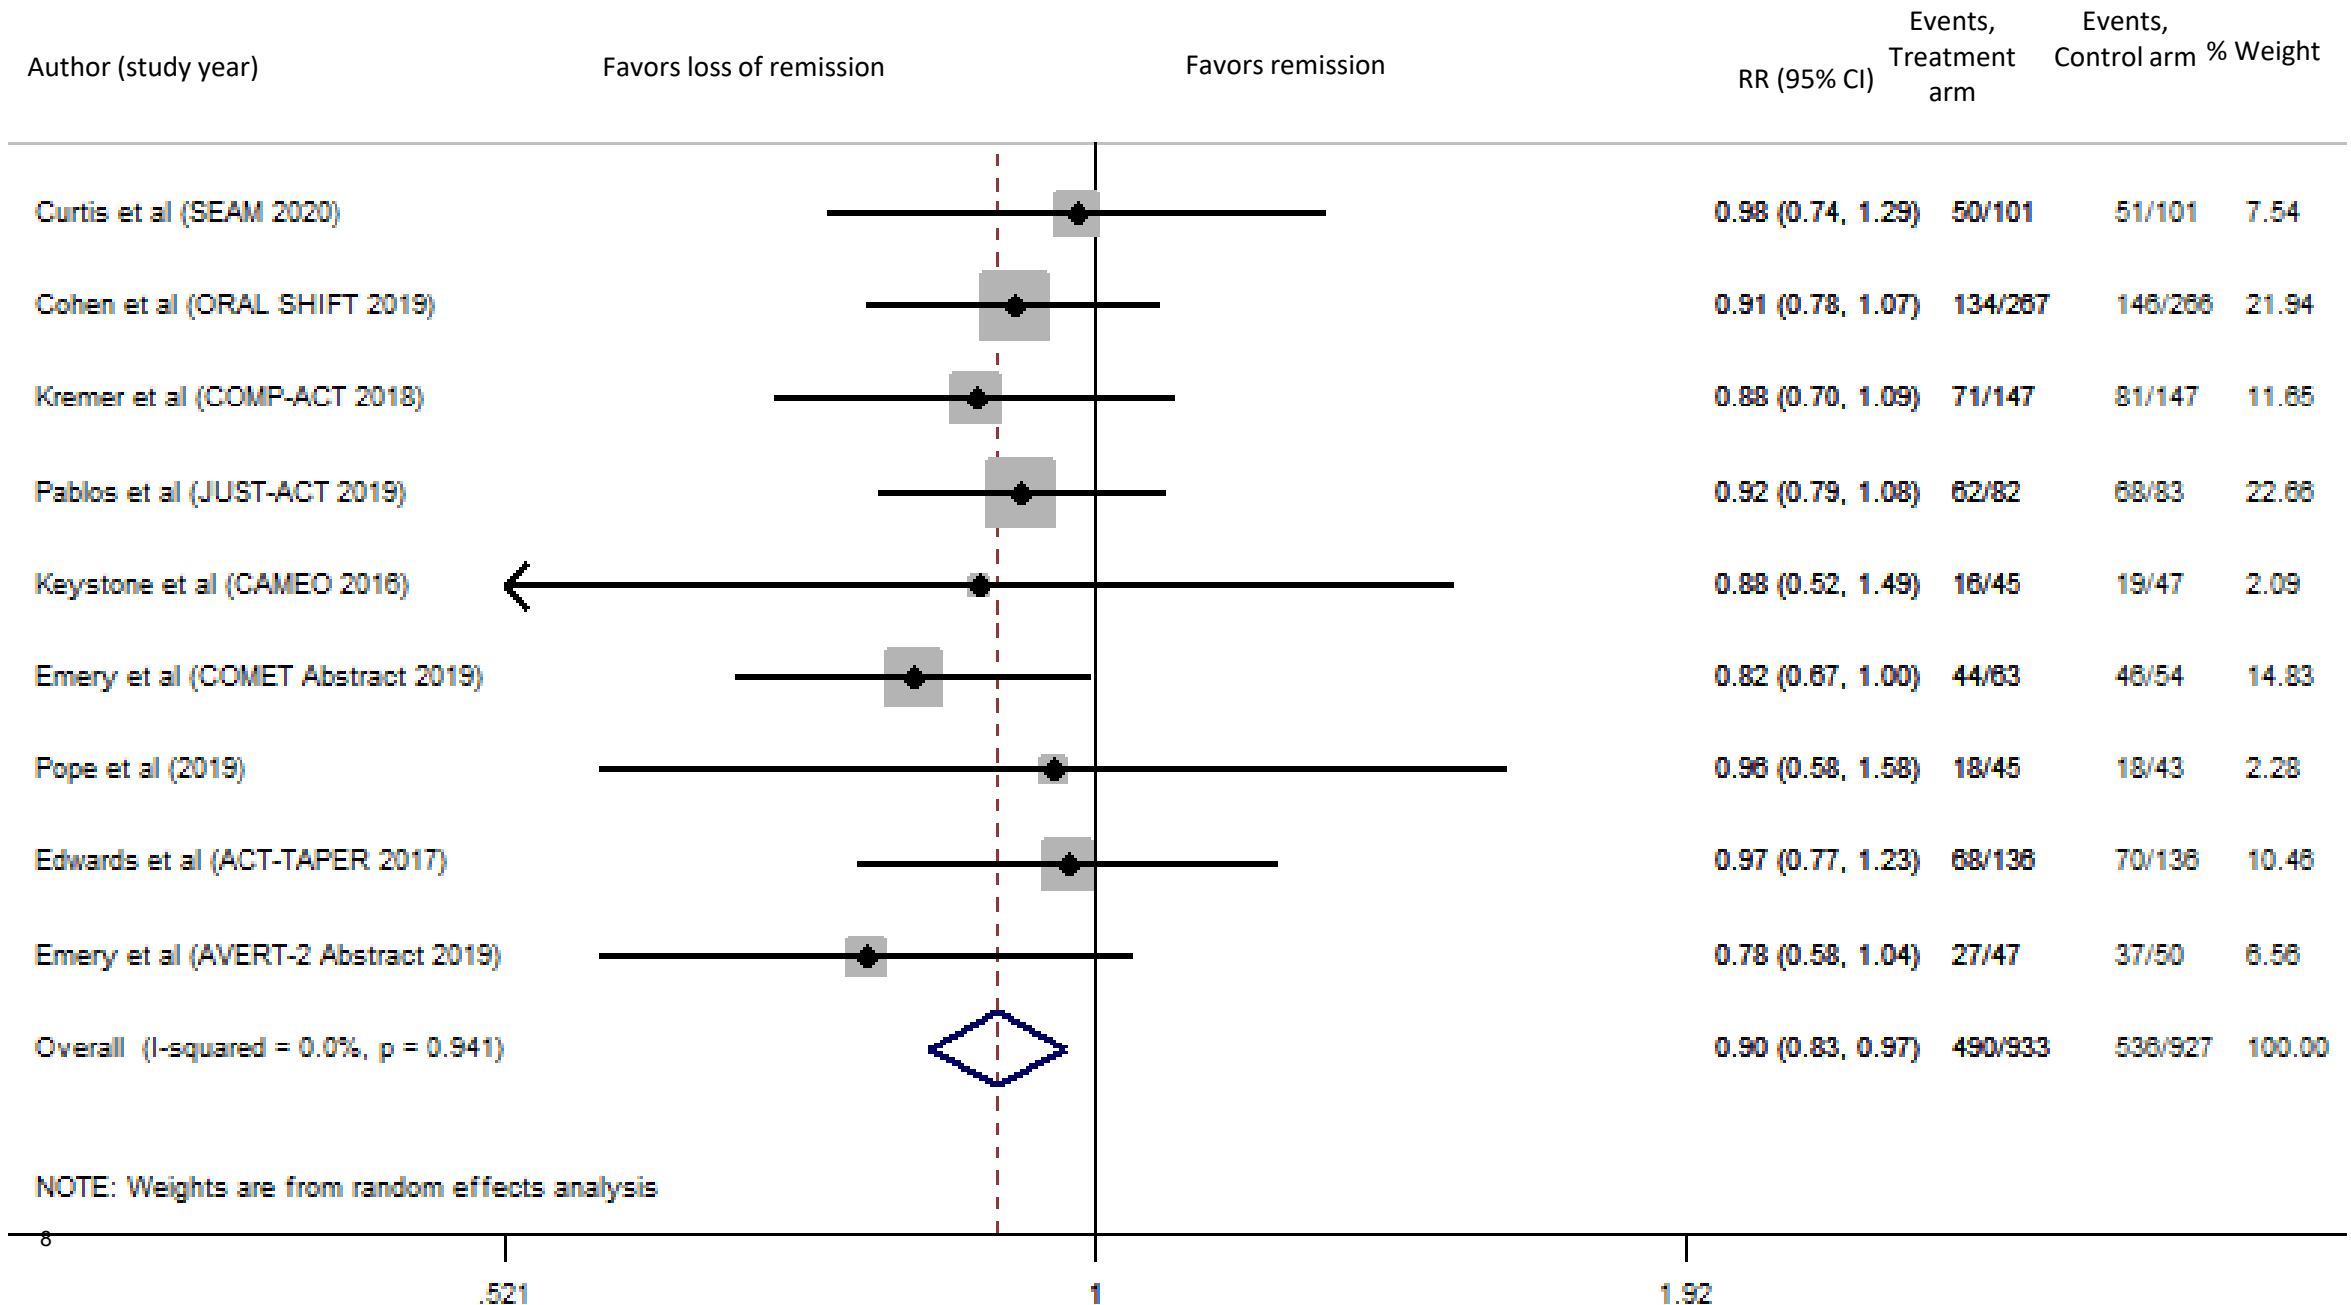



Figure S4: Risk differences of studies tapering methotrexate from targeted therapy

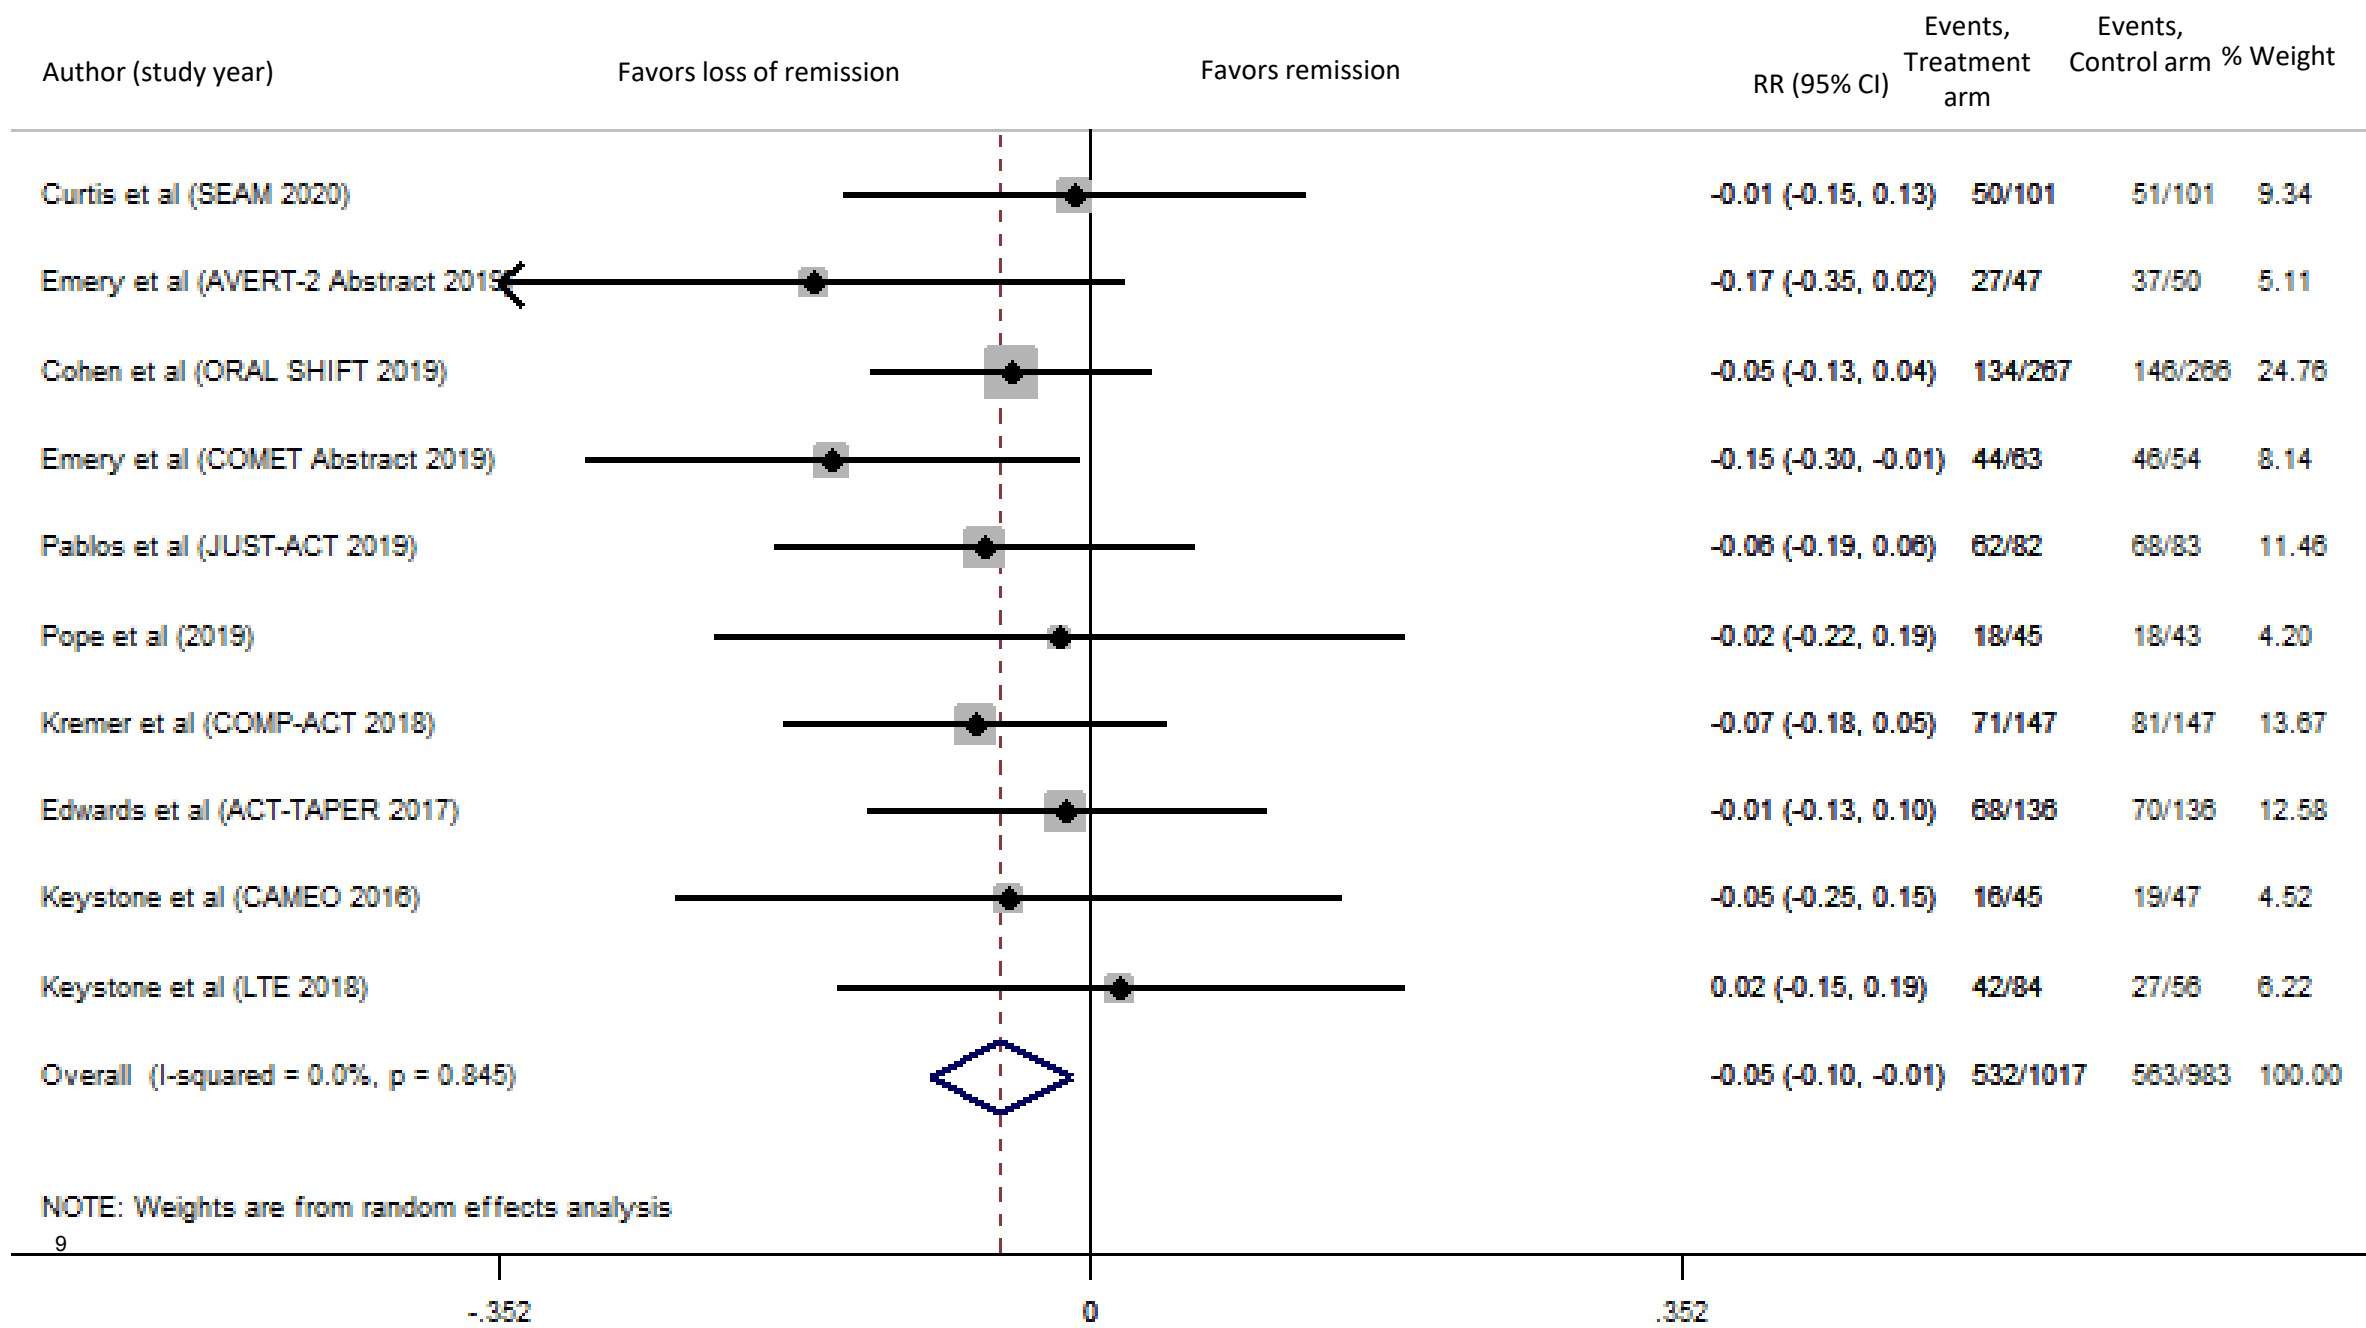

Supplement: 220152DataSuppl.pdf [file 220152DataSuppl.pdf]
